# Supplementary material for: The conserved threonine-rich region of the HCF-1PRO repeat activates promiscuous OGT:UDP-GlcNAc glycosylation and proteolysis activities
Source: PubMed Central journal article supplement (PMC6240873; doi:10.1074/jbc.ra118.004185), 2018-09-17
Supplement: supp_RA118.004185_138428_1_supp_197527_pklk7y.pdf [file supp_RA118.004185_138428_1_supp_197527_pklk7y.pdf]

## **SUPPORTING INFORMATION**

The conserved threonine-rich region of the HCF-1<sub>PRO</sub> repeat activates promiscuous OGT:UDP-GlcNAc glycosylation and proteolysis activities

**Vaibhav Kapuria<sup>1</sup>, Ute F. Röhrig<sup>2</sup>, Patrice Waridel<sup>3</sup>, Fabienne Lammers<sup>1</sup>,  
Vladimir S. Borodkin<sup>4</sup>, Daan M. F. van Aalten<sup>4</sup>, Vincent Zoete<sup>2,5</sup>, and Winship Herr<sup>1</sup>**

From the <sup>1</sup> Center for Integrative Genomics, University of Lausanne, 1015 Lausanne, Switzerland; <sup>2</sup> Molecular Modelling Group, SIB Swiss Institute of Bioinformatics, Lausanne 1015, Switzerland.; <sup>3</sup> Protein Analysis Facility, Center for Integrative Genomics, Faculty of Biology and Medicine, University of Lausanne, 1015 Lausanne, Switzerland; <sup>4</sup> Centre for Gene Regulation and Expression, School of Life Sciences, University of Dundee, Dundee DD1 5EH, United Kingdom.; <sup>5</sup> Department of Fundamental Oncology, University of Lausanne, Ludwig Institute for Cancer Research, 1066 Epalinges, Switzerland.

## Supplementary Figure 1

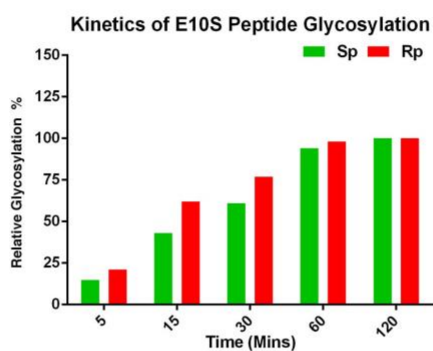

---

### **Supplementary Figure 1. Kinetics of E10S peptide glycosylation by S<sub>p</sub>- and R<sub>p</sub>-αS-UDP-GlcNAc.**

In vitro peptide glycosylation assay was performed using HCF-1<sub>PRO</sub>-repeat 2 E10S peptide, by incubating with WT OGT and either S<sub>p</sub>-αS-UDP-GlcNAc (green bar) or R<sub>p</sub>-αS-UDP-GlcNAc (red bar) as indicated. Samples were withdrawn at indicated time intervals and peptide glycosylation was detected using LC-MS as described in materials and methods. O-GlcNAcylation of the E10S peptide at different time points was normalized to the O-GlcNAcylation levels at 120 minute time point.

## Supplementary Figure 2

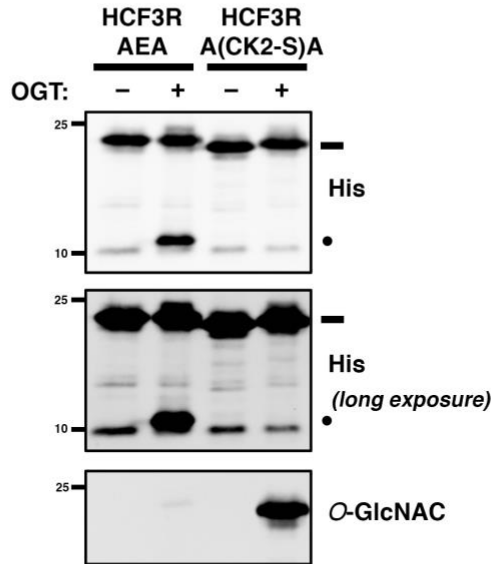

### **Supplementary Figure 2. OGT mediated cleavage and glycosylation of HCF3R substrates.**

HCF3R-AEA or chimeric HCF3R-A(CK2-S)A protein were incubated with or without OGT for 6 hr. HCF3R protein cleavage and glycosylation was assayed by SDS-PAGE and immunoblotting using an anti-His antibody (for cleavage) and RL2 anti-O-GlcNAc antibody (glycosylation). Anti-OGT was used to detect levels of OGT protein. Chimeric HCF3R-A(CK2-S)A protein did not undergo any cleavage (lack of cleavage band in long exposure) but was heavily glycosylated as compared to native HCF3R-AEA substrate.

(■, un-cleaved HCF3R substrate; ●, cleaved product.)

## Supplementary Table 1

### Glycosylation assay peptides

| Peptide Name                   | Peptide Sequence                                                                        | Purity |
|--------------------------------|-----------------------------------------------------------------------------------------|--------|
| <b>CK2</b> (17-mer)            | KKKYPPGGSTPV <b>S</b> SANMM                                                             | 97%    |
| <b>E10S</b> (26-mer)           | VRVCSNPPC <b>S</b> THETGTTNTATTATSN                                                     | 96%    |
| <b>Ch10</b> (28-mer)           | KKKYPPGGSTPV <b>S</b> THETGTTNTATTATSN                                                  | 98%    |
| <b>Ch13</b> (28-mer)           | KKKYPPGGSTPV <b>S</b> SANTGTTNTATTATSN                                                  | 96%    |
| <b>Ch13 T14A</b> (28-mer)      | KKKYPPGGSTPV <b>S</b> SAN <u>A</u> GTTNTATTATSN                                         | 99%    |
| <b>Ch13 T14Y</b> (28-mer)      | KKKYPPGGSTPV <b>S</b> SAN <u>Y</u> GTTNTATTATSN                                         | 95%    |
| <b>Ch13 T(17-22)A</b> (28-mer) | KKKYPPGGSTPV <b>S</b> SANTGT <u>A</u> <u>N</u> <u>A</u> <u>A</u> <u>A</u> <u>A</u> ATSN | 99%    |

### Cleavage assay peptides

| Peptide Name                          | Peptide Sequence                                                                                             | Purity |
|---------------------------------------|--------------------------------------------------------------------------------------------------------------|--------|
| <b>HCF-SHORT</b> (32-mer)             | YVRVCSNPPC <b>E</b> THQTGTTNTATTATSNMAGQH -NH <sub>2</sub>                                                   | 98%    |
| <b>CK2(S10) – Thr-rich*</b> (32-mer)  | KKKPPGGSTPV <b>S</b> SANTGTTNTATTATSNMAGQH -NH <sub>2</sub>                                                  | 98%    |
| <b>CK2(E10) – Thr-rich*</b> (32-mer)  | KKKPPGGSTPV <b>E</b> SANTGTTNTATTATSNMAGQH -NH <sub>2</sub>                                                  | 99%    |
| <b>CK2(E10) – Thr-rich*</b> (32-mer)  | KKKPPGGSTPV <b>E</b> SANTGT <u>A</u> <u>N</u> <u>A</u> <u>A</u> <u>A</u> <u>A</u> ATSNMAGQH -NH <sub>2</sub> | 99%    |
| <b>CK2(E9S10)– Thr-rich*</b> (33-mer) | KKKPPGGSTP <b>V</b> <b>E</b> SANTGTTNTATTATSNMAGQH -NH <sub>2</sub>                                          | 98%    |

## Supplementary Table 2

### HCF3R-AEA

PGTVTLVCSNPPCATHETGTTNTATTTVVANLGGHPQPTQVQFVCDRQEAAAASLVTST  
VGQQNGSVVRVCSNPPCE<sup>U</sup>THETGTTNTATTATSNMAGQHGC SNPPCATHETGTTNTA  
TTAMSSVGAN

### HCF3R-ASA

PGTVTLVCSNPPCATHETGTTNTATTTVVANLGGHPQPTQVQFVCDRQEAAAASLVTST  
VGQQNGSVVRVCSNPPCS<sup>U</sup>THETGTTNTATTATSNMAGQHGC SNPPCATHETGTTNTA  
TTAMSSVGAN

### HCF3R-A(CK2-S)A

PGTVTLVCSNPPCATHETGTTNTATTTVVANLGGHPQPTQVQFVCDRQEAAAASLVTST  
VGQQNGSVVRPGGSTPV<sup>S</sup>SANTGTTNTATTATSNMAGQHGC SNPPCATHETGTTNTA  
TTAMSSVGAN

### HCF3R-A(CK2-E)A

PGTVTLVCSNPPCATHETGTTNTATTTVVANLGGHPQPTQVQFVCDRQEAAAASLVTST  
VGQQNGSVVRPGGSTPV<sup>E</sup>SANTGTTNTATTATSNMAGQHGC SNPPCATHETGTTNTA  
TTAMSSVGAN
